# Supplementary material for: Development of Smart Mobility Infrastructure in Saudi Arabia: A Benchmarking Approach
Source: MDPI journal article supplement (doi:10.3390/su15043158), 2023-02-09
Supplement: s1 [file s1]

## Supplementary information

**Table S1.** Indicators Data.

| NAME                                  | INDICATORS       | JAPAN  | KOREA   | SINGAPOR | SAUDI ARABIA |
|---------------------------------------|------------------|--------|---------|----------|--------------|
| MAAS                                  | UE_MaaS          | A      | A       | A        | NA           |
| SMART PARKING                         | UE_SmPark        | FC     | FC      | FC       | PC           |
| ADVANCED TICKETING AND PAYMENTS       | UE_epay          | FC     | FC      | FC       | FC           |
| REAL TIME COMMUNICATION TO PASSENGERS | UE_realtime_comm | FC     | FC      | FC       | TP           |
| ACTIVE MOBILITY                       | EM_amob          | FC     | FC      | FC       | PC           |
| SHARED MOBILITY                       | EM_smob          | 67.40% | 102.30% | 104.40%  | 53.70%       |
| CONNECTED VEHICLES                    | EM_cveh          | A      | A       | A        | A            |
| DRIVERLESS TRAINS                     | EM_DLtrain       | 68     | 161     | 126      | 176          |
| HELI-TAXI                             | EM_Htaxi         | 18.349 | 19.42   | 21.88    | 13.414       |
| DETECTION                             | PV_detect        | FC     | FC      | FC       | FC           |
| TRAFFIC SIGNAL CONTROL                | PV_signal        | FC     | FC      | FC       | PC           |
| SPEED LIMIT CONTROL                   | PV_Splimit       | FC     | FC      | FC       | FC           |
| ACCESS CONTROL                        | PV_Acontrol      | FC     | FC      | NA       | NA           |
| ELECTRONIC PAYMENT                    | PV_epay          | FC     | FC      | FC       | FC           |
| REAL TIME COMMUNICATION               | PV_realcomm      | FC     | FC      | FC       | PC           |
| TRAFFIC FORECASTING                   | PV_trforecast    | FC     | FC      | FC       | NA           |
| DEMAND AND SUPPLY MANAGEMENT          | PV_D&Smgt        | FC     | FC      | FC       | NA           |
| SMART CARD                            | PV_Smcard        | FC     | FC      | FC       | PC           |
| BUS LANES                             | PT_Blanes        | FC     | FC      | FC       | TP           |
| PRIORITY SIGNAL                       | PT_Psignal       | FC     | FC      | FC       | NA           |
| AUTONOMOUS TRANSIT                    | PT_Atransit      | A      | A       | A        | NA           |
| EXPRESS TRANSIT SERVICE               | PT_ExpTransit    | A      | A       | A        | A            |
| ELECTRONIC PAYMENT                    | PT_ExpTransit    | A      | A       | A        | A            |
| REAL TIME COMMUNICATION               | PT_epay          | A      | A       | A        | PC           |
| REAL TIME COMMUNICATION               | PT_realcomm_pass | FC     | FC      | FC       | TP           |
| INTEGRATED TRANSPORT TERMINALS        | PT_realcomm_para | FC     | FC      | FC       | PC           |
| AUTONOMOUS MODES                      | PT_Imobhubs      | FC     | FC      | FC       | NA           |

|                                       |                  |        |        |        |        |
|---------------------------------------|------------------|--------|--------|--------|--------|
| HYPERLOOP                             | ETech_Drobots    | TP     | TP     | TP     | NA     |
| DELIVERY ROBOTS                       | ETech_Ddrones    | TP     | TP     | TP     | NA     |
| DELIVERY DRONES                       | Etech_Automode   | 20.88  | 22.71  | 24.45  | 5      |
| DATA MANAGEMENT AND SHARING PLATFORMS | Etech_Hloop      | NA     | NA     | NA     | NA     |
| ANALYTICS                             | ETech_Drobots    | TP     | TP     | TP     | TP     |
| DATA SHARING PLATFORMS                | Etech_Ddrones    | TP     | TP     | TP     | TP     |
| MOBILE APPS                           | DA_datamgt       | FC     | FC     | FC     | TP     |
| REGULATIONS                           | DA_analytics     | YES    | YES    | YES    | NO     |
| CYBER SECURITY AND PRIVACY            | DA_Platforms     | 0.691  | 0.766  | 0.411  | 0      |
| SURVEILLANCE AND CRISIS MANAGEMENT    | DA_mobapp        | FC     | FC     | FC     | PC     |
| INNOVATION AND ENGAGEMENT             | GR_regulations   | FC     | FC     | FC     | PC     |
| POLICY                                | GR_cybersec      | 97.82  | 98.52  | 98.52  | 99.54  |
| PILOT PROJECT                         | GR_Surveillance  | FC     | FC     | FC     | PC     |
| STANDARD AND FRAMEWORK                | GR_innovengage   | 0.808  | 0.826  | 0.738  | NA     |
| COLLABORATIONS                        | GR_policy        | FC     | FC     | FC     | PC     |
| (R&D)                                 | GR_pilotproj     | 0.857  | 1      | 1      | 0.2    |
| EMERGENCY PRIORITY SIGNAL             | GR_stand&fram    | YES    | YES    | YES    | NO     |
| EMERGENCY DRIVER COMMUNICATION        | GR_collabo       | YES    | YES    | YES    | NA     |
| ROAD NETWORK                          | GR_R&D           | YES    | YES    | YES    | YES    |
| ELECTRIC VEHICLE CHARGING             | EM_Priosignal    | FC     | FC     | FC     | NA     |
| SMART MOTORWAYS                       | EM_drivComm      | FC     | FC     | FC     | NA     |
| SMART PARKING FACILITIES              | INF_roadnet      | 1.13   | 3.23   | 4.79   | 10.3   |
| TRAFFIC SIGNS AND SIGNALS             | INF_Evcharge     | 44     | 50     | 42     | 20     |
| INTERMODAL MOBILITY HUBS              | INF_sm_motoways  | YES    | YES    | YES    | NO     |
| INTERNET-OF-THINGS (IOT)              | INF_Smparking    | FC     | FC     | FC     | PC     |
| INTERNET COVERAGE                     | INF_signs&signal | FC     | FC     | FC     | FC     |
| LABORATORIES                          | INF_mobhobs      | YES    | YES    | YES    | NO     |
| TEST BEDS                             | INF_IoT          | FC     | FC     | FC     | PC     |
| CONNECTED AND AUTONOMOUS VEHICLES     | INF_intcov       | 92.70% | 96.50% | 89.73% | 92.50% |
| SURVEILLANCE                          | INF_Lab          | YES    | YES    | YES    | NO     |
| GIS                                   | INF_testbed      | YES    | YES    | YES    | NO     |

|                               |                     |       |       |       |    |
|-------------------------------|---------------------|-------|-------|-------|----|
| ITS TRAFFIC MANAGEMENT CENTER | INF_CAV             | 3.233 | 3.525 | 3.379 | 1  |
| USER EXPERIENCE               | INF_surveillance    | A     | A     | A     | A  |
| EXISTING SMART MOBILITY MODES | INF_GIS             | A     | A     | A     | A  |
| PRIVATE TRANSPORT             | INF_ITStrmgt_centre | FC    | FC    | FC    | TP |

**Table S2.** The set of indicators used for this study.

| <b>Indicator Code</b>   | <b>Indicator Name</b>                   | <b>Unit</b>  | <b>Parent</b>                 |
|-------------------------|-----------------------------------------|--------------|-------------------------------|
| <i>UE_MaaS</i>          | MaaS                                    | score        | User Experience               |
| <i>UE_SmPark</i>        | Smart parking                           | score        | User Experience               |
| <i>UE_epay</i>          | Advanced ticketing and payments         | score        | User Experience               |
| <i>UE_realtime_comm</i> | Real-time communication with passengers | score        | User Experience               |
| <i>EM_amob</i>          | Active mobility                         | score        | Existing smart mobility modes |
| <i>EM_smob</i>          | Shared mobility                         | percentage   | Existing smart mobility modes |
| <i>EM_cveh</i>          | Connected vehicles                      | Availability | Existing smart mobility modes |
| <i>EM_DLtrain</i>       | Driverless trains                       | Length       | Existing smart mobility modes |
| <i>EM_Htaxi</i>         | Heli-taxi                               | score        | Existing smart mobility modes |
| <i>PV_detect</i>        | Detection                               | score        | Private transport             |
| <i>PV_signal</i>        | Traffic signal control                  | score        | Private transport             |
| <i>PV_Splimit</i>       | Speed limit control                     | score        | Private transport             |
| <i>PV_Acontrol</i>      | Access control                          | score        | Private transport             |
| <i>PV_epay</i>          | Electronic payment                      | score        | Private transport             |
| <i>PV_realcomm</i>      | Real-time communication                 | score        | Private transport             |
| <i>PV_trforecast</i>    | Traffic Forecasting                     | operations   | Private transport             |
| <i>PV_D&amp;Smgt</i>    | Demand and supply management            | score        | Private transport             |
| <i>PV_Smcard</i>        | Smart card                              | score        | Private transport             |
| <i>PT_Blanes</i>        | Bus lanes                               | score        | Public transport              |
| <i>PT_Psignal</i>       | Priority signal                         | score        | Public transport              |
| <i>PT_Atransit</i>      | Autonomous transit                      | Availability | Public transport              |
| <i>PT_ExpTransit</i>    | Express transit service                 | availability | Public transport              |
| <i>PT_epay</i>          | Electronic payment                      | score        | Public transport              |
| <i>PT_realcomm_pass</i> | Real-time communication                 | score        | Public transport              |
| <i>PT_realcomm_para</i> | Real-time communication                 | score        | Public transport              |
| <i>PT_Imobhubs</i>      | Integrated transport terminals          | score        | Public transport              |
| <i>Etech_Automode</i>   | Autonomous modes                        | Availability | Emerging technology           |

|                             |                                       |              |                           |
|-----------------------------|---------------------------------------|--------------|---------------------------|
| <i>Etech_Hloop</i>          | Hyperloop                             | Availability | Emerging technology       |
| <i>ETech_Drobots</i>        | Delivery robots                       | Availability | Emerging technology       |
| <i>Etech_Ddrones</i>        | Delivery drones                       | score        | Emerging technology       |
| <i>DA_datamgt</i>           | Data management and sharing platforms | Availability | Data and analytics        |
| <i>DA_analytics</i>         | Analytics                             | score        | Data and analytics        |
| <i>DA_Platforms</i>         | Data sharing platforms                | score        | Data and analytics        |
| <i>DA_mobapp</i>            | Mobile apps                           | score        | Data and analytics        |
| <i>GR_regulations</i>       | Regulations                           | score        | Governance and Regulation |
| <i>GR_cybersec</i>          | Cyber security and privacy            | score        | Governance and Regulation |
| <i>GR_Surveillance</i>      | Surveillance and crisis management    | score        | Governance and Regulation |
| <i>GR_innovengage</i>       | Innovation and engagement             | score        | Governance and Regulation |
| <i>GR_policy</i>            | Policy                                | score        | Governance and Regulation |
| <i>GR_pilotproj</i>         | Pilot Project                         | availability | Governance and Regulation |
| <i>GR_stand&amp;fram</i>    | Standard and Framework                | availability | Governance and Regulation |
| <i>GR_collabo</i>           | Collaborations                        | availability | Governance and Regulation |
| <i>GR_R&amp;D</i>           | (R&D)                                 | score        | Governance and Regulation |
| <i>EM_Priosignal</i>        | Emergency Priority signal             | score        | Emergency transport       |
| <i>EM_drivComm</i>          | Emergency driver communication        | Length       | Emergency transport       |
| <i>INF_roadnet</i>          | Road network                          | score        | Infrastructure            |
| <i>INF_Evcharge</i>         | Electric vehicle charging             | availability | Infrastructure            |
| <i>INF_sm_motoways</i>      | Smart motorways                       | score        | Infrastructure            |
| <i>INF_Smparking</i>        | Smart parking facilities              | score        | Infrastructure            |
| <i>INF_signs&amp;signal</i> | Traffic signs and signals             | score        | Infrastructure            |
| <i>INF_mobhobs</i>          | Intermodal mobility hubs              | score        | Infrastructure            |
| <i>INF_IoT</i>              | Internet-of-Things (IoT)              | percentage   | Infrastructure            |
| <i>INF_intcov</i>           | Internet coverage                     | availability | Infrastructure            |
| <i>INF_Lab</i>              | Laboratories                          | availability | Infrastructure            |
| <i>INF_testbed</i>          | Testbeds                              | availability | Infrastructure            |
| <i>INF_CAV</i>              | Connected and Autonomous vehicles     | availability | Infrastructure            |
| <i>INF_surveillance</i>     | Surveillance                          | availability | Infrastructure            |
| <i>INF_GIS</i>              | GIS                                   | score        | Infrastructure            |
| <i>INF_ITStrmgt_centre</i>  | ITS Traffic management center         | score        | Infrastructure            |

Where UE, EM, PV, PT INF, GR, DA and Etech are User experience, modes, Emerging technology, private transportation, public transportation, Governance and regulations, Data analytics and Infrastructure respectively.
